# Supplementary material for: Automated 3D Segmentation of the Aorta and Pulmonary Artery on Non-Contrast-Enhanced Chest Computed Tomography Images in Lung Cancer Patients
Source: MDPI journal article supplement (doi:10.3390/diagnostics12040967), 2022-04-12
Supplement: s1 [file s1]

**Supplementary Table S1.** Patient clinicopathological features and preoperative results

|                                 | N (%) or mean $\pm$ SD |
|---------------------------------|------------------------|
| Total patient number            | 179                    |
| Age, year                       | 60.9 $\pm$ 9.4         |
| Female                          | 115 (64.2%)            |
| Smoking                         | 38 (21.2%)             |
| ECOG                            |                        |
| 0                               | 23 (12.8%)             |
| $\geq 1$                        | 156 (87.2%)            |
| PFT                             |                        |
| FVC, % <sup>a</sup>             | 108.7 $\pm$ 14.7       |
| FEV1, % <sup>a</sup>            | 108.2 $\pm$ 17.2       |
| Lung cancer family history      | 36 (20.1%)             |
| Histology                       |                        |
| Non-adenocarcinoma <sup>a</sup> | 16 (8.9%)              |
| Adenocarcinoma                  | 163 (91.1%)            |
| Pathological stage              |                        |
| IA                              | 103 (57.5%)            |
| IB                              | 20 (11.2%)             |
| II                              | 36 (20.1%)             |
| III                             | 20 (11.2%)             |
| Post-op ICU stay, day           | 0.3 $\pm$ 0.7          |
| Post-op hospital stay, day      | 5.3 $\pm$ 3.7          |
| Postoperative complications     |                        |
| All complications               | 111 (62.0%)            |
| Grade 3a or greater             | 11 (6.2%)              |
| Grade 3b or greater             | 0 (0%)                 |
| 30-day mortality                | 0 (0%)                 |

ECOG, Eastern Cooperative Oncology Group performance status; FEV1, forced expiratory volume in 1 second; FVC, forced vital capacity; ICU, intensive care unit; PFT, pulmonary function test; SD, standard deviation.
